# Supplementary material for: Oncotype DX breast cancer recurrence score can be predicted with a novel nomogram using clinicopathologic data
Source: Breast Cancer Res Treat. 2017 Feb 27;163(1):51–61. doi: 10.1007/s10549-017-4170-3 (PMC5387031; doi:10.1007/s10549-017-4170-3)
Supplement: Supplementary file 1 — Supplementary material 1 (DOCX 38 kb) [file 10549_2017_4170_MOESM1_ESM.docx]

**ONLINE RESOURCE**

**Title:** Oncotype DX breast cancer recurrence score can be predicted with a novel nomogram using clinicopathologic data

**Authors:** Amila Orucevic, MD, PhD1*, John L. Bell, MD2, Alison P. McNabb, MSc3 and Robert E. Heidel, PhD2

**Authors affiliations:**

1*Departments of Pathology, University of Tennessee Medical Center, 1924 Alcoa Hwy, Knoxville, Tennessee, 37920, USA

2Department of Surgery, University of Tennessee Medical Center, 1924 Alcoa Hwy, Knoxville, Tennessee, 37920, USA

3Graduate School of Medicine, University of Tennessee Medical Center, 1924 Alcoa Hwy, Knoxville, Tennessee, 37920, USA

***Corresponding author**: Amila Orucevic, MD, PhD, Department of Pathology, University of Tennessee Medical Center at Knoxville, Knoxville, TN, 37920,

Phone: 865-305-9080, Fax: 865-305-6866, e-mail: [aorucevic@utmck.edu](mailto:aorucevic@utmck.edu)

**Online resource Table A1.** Logistic regression analysis of original and external validations cohorts for predicting a low-risk Oncotype DX recurrence score test results with commercial cut-off values for a low-risk score (0-17)

|  | **Original cohort (N=27685)** | | | | | **External validation cohort (N=12763)** | | | | |
| --- | --- | --- | --- | --- | --- | --- | --- | --- | --- | --- |
| **β** | ***p*** | **CI** | **95% CI** | | **β** | ***p*** | **CI** | **95% CI** | |
| **Lower** | **Upper** | **Upper** | **Lower** |
| **Age** | .005 | .014 | 1.005 | 1.001 | 1.01 | .02 | <.001 | 1.02 | 1.014 | 1.026 |
| **Tumor size** | -.032 | <.001 | .968 | .963 | .974 | -.027 | <.001 | .974 | .966 | .981 |
| **Grade 3** | Referent <.001 | | | | | Referent <.001 | | | | |
| **Grade 2** | 2.35 | <.001 | 10.48 | 9.53 | 11.54 | 2.305 | <.001 | 10.02 | 8.59 | 11.69 |
| **Grade 1** | 3.9 | <.001 | 49.42 | 41.37 | 59.03 | 3.401 | <.001 | 30.0 | 24.42 | 36.84 |
| **PR positive** | Referent <.001 | | | | | Referent <.001 | | | | |
| **PR negative** | -2.962 | <.001 | .052 | .046 | .059 | -3.498 | <.001 | .030 | .023 | .040 |
| **LVI not present** | Referent <.001 | | | | | Referent <.001 | | | | |
| **LVI present** | -.025 | .702 | .976 | .860 | 1.107 | -.399 | <.001 | .671 | .559 | .807 |
| **IDC** | Referent <.001 | | | | | Referent <.001 | | | | |
| **ILC** | 1.407 | <.001 | 4.083 | 3.314 | 5.03 | .348 | .003 | 1.416 | 1.125 | 1.784 |
| **IDC+ILC** | 1.223 | <.001 | 3.397 | 2.685 | 4.298 | .546 | <.001 | 1.726 | 1.315 | 2.265 |
| **IDC + others** | .294 | .030 | 1.342 | 1.028 | 1.751 | .162 | .335 | 1.176 | .846 | 1.635 |

Table legend: PR – progesterone receptor; IDC – invasive ductal carcinoma; ILC – invasive lobular carcinoma; IDC + ILC – invasive ductal and lobular carcinoma; IDC + others – invasive ductal carcinoma mixed with other types; LVI – lymph-vascular invasion

**Online resource Table A2.** Logistic regression analysis of original and external validation cohorts for predicting a high-risk Oncotype DX recurrence score test results with commercial cut-off values for a high-risk score (31-100)

|  | **Original cohort (N=27685)** | | | | | **External validation cohort (N=12763)** | | | | |
| --- | --- | --- | --- | --- | --- | --- | --- | --- | --- | --- |
| **β** | ***p*** | **CI** | **95% CI** | | **β** | ***p*** | **CI** | **95% CI** | |
| **Lower** | **Upper** | **Upper** | **Lower** |
| **Age** | -.005 | .014 | .995 | .991 | .999 | -.007 | .042 | .993 | .987 | 1.000 |
| **Tumor size** | .032 | <.001 | 1.033 | 1.027 | 1.039 | .036 | <.001 | 1.037 | 1.029 | 1.046 |
| **Grade 3** | Referent <.001 | | | | | Referent <.001 | | | | |
| **Grade 2** | -2.35 | <.001 | .095 | .087 | .105 | -2.512 | <.001 | .081 | .070 | .094 |
| **Grade 1** | -3.9 | <.001 | .020 | .017 | .024 | -3.99 | <.001 | .019 | .014 | .024 |
| **PR positive** | Referent <.001 | | | | | Referent <.001 | | | | |
| **PR negative** | 2.962 | <.001 | 19.33 | 17.06 | 21.906 | 2.995 | <.001 | 19.976 | 16.429 | 24.289 |
| **LVI not present** | Referent <.001 | | | | | Referent <.001 | | | | |
| **LVI present** | .025 | .702 | 1.025 | .904 | 1.162 | .067 | .493 | 1.069 | .884 | 1.293 |
| **IDC** | Referent <.001 | | | | | Referent <.001 | | | | |
| **ILC** | -1.407 | <.001 | .245 | .199 | .302 | -1.286 | <.001 | .276 | .205 | .373 |
| **IDC+ILC** | -1.223 | <.001 | .294 | .233 | .372 | -1.177 | <.001 | .308 | .217 | .438 |
| **IDC + others** | -.294 | .030 | .745 | .571 | .972 | -.078 | .689 | .925 | .630 | 1.357 |

Table legend: PR – progesterone receptor; IDC – invasive ductal carcinoma; ILC – invasive lobular carcinoma; IDC + ILC – invasive ductal and lobular carcinoma; IDC + others – invasive ductal carcinoma mixed with other types; LVI – lymph-vascular invasion

**Online resource Table A3.** Logistic regression analysis of original and external validation cohorts for predicting a low-risk Oncotype DX recurrence score test results with TAILORx trial cut-off values for a low-risk score (0-10)

|  | **Original cohort (N=27685)** | | | | | **External validation cohort (N=12763)** | | | | |
| --- | --- | --- | --- | --- | --- | --- | --- | --- | --- | --- |
| **β** | ***p*** | **CI** | **95% CI** | | **β** | ***p*** | **CI** | **95% CI** | |
| **Lower** | **Upper** | **Upper** | **Lower** |
| **Age** | .018 | <.001 | 1.019 | 1.015 | 1.023 | .02 | <.001 | 1.020 | 1.014 | 1.026 |
| **Tumor size** | -.016 | <.001 | .984 | .979 | .990 | -.027 | <.001 | .974 | .966 | .981 |
| **Grade 3** | Referent <.001 | | | | | Referent <.001 | | | | |
| **Grade 2** | 2.20 | <.001 | 9.024 | 8.113 | 10.036 | 2.305 | <.001 | 10.026 | 8.597 | 11.692 |
| **Grade 1** | 3.465 | <.001 | 31.992 | 27.786 | 36.834 | 3.401 | <.001 | 30.001 | 24.427 | 36.846 |
| **PR positive** | Referent <.001 | | | | | Referent <.001 | | | | |
| **PR negative** | -3.484 | <.001 | .031 | .025 | .037 | -3.498 | <.001 | .030 | .023 | .040 |
| **LVI not present** | Referent <.001 | | | | | Referent <.001 | | | | |
| **LVI present** | -.190 | .003 | .827 | .730 | .937 | -.399 | <.001 | .671 | .559 | .807 |
| **IDC** | Referent <.001 | | | | | Referent <.001 | | | | |
| **ILC** | .355 | <.001 | 1.426 | 1.223 | 1.663 | .348 | .003 | 1.416 | 1.125 | 1.784 |
| **IDC+ILC** | .531 | <.001 | 1.701 | 1.424 | 2.033 | .546 | <.001 | 1.726 | 1.315 | 2.265 |
| **IDC + others** | .484 | <.001 | 1.622 | 1.288 | 2.043 | .162 | .335 | 1.176 | .846 | 1.635 |

Table legend: PR – progesterone receptor; IDC – invasive ductal carcinoma; ILC – invasive lobular carcinoma; IDC + ILC – invasive ductal and lobular carcinoma; IDC + others – invasive ductal carcinoma mixed with other types; LVI – lymph-vascular invasion

**Online resource Table A4.** Logistic regression analysis of original and external validation cohorts for predicting a high-risk Oncotype DX recurrence score test results with TAILORx trial cut-off values for a high-risk score (26-100)

|  | **Original cohort (N=27685)** | | | | | **External validation cohort (N=12763)** | | | | |
| --- | --- | --- | --- | --- | --- | --- | --- | --- | --- | --- |
| **β** | ***p*** | **CI** | **95% CI** | | **β** | ***p*** | **CI** | **95% CI** | |
| **Lower** | **Upper** | **Upper** | **Lower** |
| **Age** | -.018 | <.001 | .982 | .978 | .986 | -.02 | <.001 | .980 | .974 | .986 |
| **Tumor size** | .016 | <.001 | 1.016 | 1.011 | 1.021 | .027 | <.001 | 1.027 | 1.019 | 1.035 |
| **Grade 3** | Referent <.001 | | | | | Referent <.001 | | | | |
| **Grade 2** | -2.20 | <.001 | .111 | .10 | .123 | -2.305 | <.001 | .10 | .086 | .116 |
| **Grade 1** | -3.465 | <.001 | .031 | .027 | .036 | -3.401 | <.001 | .033 | .027 | .041 |
| **PR positive** | Referent <.001 | | | | | Referent <.001 | | | | |
| **PR negative** | 3.484 | <.001 | 32.58 | 26.83 | 39.56 | 3.498 | <.001 | 33.04 | 24.79 | 44.02 |
| **LVI not present** | Referent <.001 | | | | | Referent <.001 | | | | |
| **LVI present** | .190 | .003 | 1.209 | 1.068 | 1.369 | .399 | <.001 | 1.49 | 1.24 | 1.79 |
| **IDC** | Referent <.001 | | | | | Referent <.001 | | | | |
| **ILC** | -.355 | <.001 | .701 | .601 | .818 | -.348 | .003 | .706 | .560 | .889 |
| **IDC+ILC** | -.531 | <.001 | .588 | .492 | .702 | -.546 | <.001 | .579 | .441 | .761 |
| **IDC + others** | -.484 | <.001 | .616 | .490 | .776 | -.162 | .335 | .85 | .612 | 1.182 |

Table legend: PR – progesterone receptor; IDC – invasive ductal carcinoma; ILC – invasive lobular carcinoma; IDC + ILC – invasive ductal and lobular carcinoma; IDC + others – invasive ductal carcinoma mixed with other types; LVI – lymph-vascular invasion

**Online resource Table A5.** Points assigned for a probability of a high-risk or a low-risk Oncotype DX (ODX) recurrence score (RS) test results in original and external validation cohort nomograms with commercial high-risk and low-risk cut-off values

|  | | ***Points assigned for original cohort nomogram (2010-2012; N=27,685)***  ***Commercial cut-off values*** | | ***Points assigned for external validation cohort nomogram (2013; N=12,763)***  ***Commercial cut-off values*** | |
| --- | --- | --- | --- | --- | --- |
| **Clinicopathologic Characteristics** | | **High-risk ODX RS**  **(31-100)** | **Low-risk ODX RS**  **(0-17)** | **High-risk ODX RS**  **(31-100)** | **Low-risk ODX RS**  **(0-17)** |
| **Age (20-90)** | | 8.9 | | 11.8 | |
| **Tumor size**  **(6-50 mm)** | | 36.1 | | 40.14 | |
| **Grade** | **1** | 0 | 100 | 0 | 100 |
| **2** | 40 | 60 | 37.1 | 62.9 |
| **3** | 100 | 0 | 100 | 0 |
| **PR** | **Positive ≥1%** | 0 | 75.9 | 0 | 75 |
| **Negative <1%** | 75.9 | 0 | 75 | 0 |
| **LVI** | **Yes** | 0.6 | 0 | 1.6 | 0 |
| **No** | 0 | 0.6 | 0 | 1.6 |
| **Histologic type of invasive BC** | **IDC** | 36 | 0 | 32.2 | 0 |
| **ILC** | 0 | 36 | 0 | 32.2 |
| **IDC + ILC** | 7.5 | 31 | 1.9 | 29.4 |
| **IDC + others** | 31 | 7.5 | 29.4 | 1.9 |
| **Maximum points** | | 257.5 | | 260.7 | |
| **Probability** | | 0.003 per point | | 0.003376 per point | |
| **C-index (95% CI)** | | .887 (.880-.893) | | .89 (.88-.90) | |
| **P value** | | <.001 | | <.001 | |

Table legend: ODX – Oncotype DX; RS – recurrence score; PR – progesterone receptor; IDC – invasive ductal carcinoma; ILC – invasive lobular carcinoma; IDC + ILC – invasive ductal and lobular carcinoma; IDC + others – invasive ductal carcinoma mixed with other types; LVI – lymph-vascular invasion

**Online resource Table A6.** Points assigned for a probability of a high-risk or a low-risk Oncotype DX (ODX) recurrence score (RS) test results in original and external validation cohort nomograms with TAILORx trial high-risk and low-risk cut-off values

|  | | ***Points assigned for original cohort nomogram (2010-2012; N=27,685)***  ***TAILORx trial cut-off values*** | | ***Points assigned for external validation cohort nomogram (2013; N=12,763)***  ***TAILORx trial cut-off values*** | |
| --- | --- | --- | --- | --- | --- |
| **Clinicopathologic Characteristics** | | **High-risk ODX RS**  **(26-100)** | **Low-risk ODX RS**  **(0-10)** | **High-risk ODX RS**  **(26-100)** | **Low-risk ODX RS**  **(0-10)** |
| **Age (21-90)** | | 35.6 | | 39.9 | |
| **Tumor size**  **(6-50 mm)** | | 20.2 | | 33.3 | |
| **Grade** | **1** | 0 | 99.4 | 0 | 97.2 |
| **2** | 36.4 | 63 | 31.4 | 65.8 |
| **3** | 99.4 | 0 | 97.2 | 0 |
| **PR** | **Positive ≥1%** | 0 | 100 | 0 | 100 |
| **Negative <1%** | 100 | 0 | 100 | 0 |
| **LVI** | **Yes** | 5.4 | 0 | 11.4 | 0 |
| **No** | 0 | 5.4 | 0 | 11.4 |
| **Histologic type of invasive BC** | **IDC** | 15 | 0 | 15.6 | 0 |
| **ILC** | 13.8 | 10 | 4.6 | 9.9 |
| **IDC + ILC** | 0 | 15 | 0 | 15.6 |
| **IDC + others** | 10 | 13.8 | 9.9 | 4.6 |
| **Maximum points** | | 275.6 | | 297.4 | |
| **Probability** | | 0.003 per point | | 0.00325 per point | 0.003229 per point |
| **C-index (95% CI)** | | .851 (.845-.857) | | .852 (.842-.861) | |
| **P value** | | <.001 | | <.001 | |

Table legend: ODX – Oncotype DX; RS – recurrence score; PR – progesterone receptor; IDC – invasive ductal carcinoma; ILC – invasive lobular carcinoma; IDC + ILC – invasive ductal and lobular carcinoma; IDC + others – invasive ductal carcinoma mixed with other types; LVI – lymph-vascular invasion

**Online resource Document A1:**

Source code in R:

d<-read.csv("data.csv", header = TRUE, stringsAsFactors = TRUE)

attach(d)

library(rms)

dd<-datadist(Age, Size, Grade, CSF2, LVI, Histology, Outcome); options(datadist="dd")

fit<-lrm(Outcome~Age+Size+Grade+CSF2+LVI+Histology, x=TRUE, y=TRUE)

n<-nomogram(fit, fun=plogis, lp=FALSE, funlabel="Predicted Probability")

plot(n)
